# Supplementary material
Source: MDPI journal article supplement (https://www.mdpi.com/2071-1050/15/4/3775)
Supplement: s1 [file s1]

## Viennese case studies of streets and squares

(applied research project "Sustainable climate-fit urban squares and streets for the City of Vienna")

|    | District                  | Adress                      |
|----|---------------------------|-----------------------------|
| 1  | 1 <sup>st</sup> District  | Rotenturmstraße             |
| 2  | 1 <sup>st</sup> District  | Börsengasse                 |
| 3  | 2 <sup>nd</sup> District  | Alliierten Straße           |
| 4  | 2 <sup>nd</sup> District  | Karmeliterplatz             |
| 5  | 2 <sup>nd</sup> District  | Calafatiplatz               |
| 6  | 3 <sup>rd</sup> District  | Robert-Hochner-Park         |
| 7  | 4 <sup>th</sup> District  | Südtiroler Platz            |
| 8  | 4 <sup>th</sup> District  | Phorusgasse                 |
| 9  | 5 <sup>th</sup> District  | Pannaschgasse               |
| 10 | 6 <sup>th</sup> District  | Esterhazypark               |
| 11 | 6 <sup>th</sup> District  | Christian Broda Platz       |
| 12 | 7 <sup>th</sup> District  | Zieglergasse                |
| 13 | 7 <sup>th</sup> District  | Neubaugasse                 |
| 14 | 7 <sup>th</sup> District  | Urban Loritz Platz          |
| 15 | 7 <sup>th</sup> District  | Altlerchenfelder Kirche     |
| 16 | 7 <sup>th</sup> District  | Zollergasse                 |
| 17 | 8 <sup>th</sup> District  | Schlesinger Platz           |
| 18 | 9 <sup>th</sup> District  | Spittelauerplatz            |
| 19 | 9 <sup>th</sup> District  | Spittelau                   |
| 20 | 9 <sup>th</sup> District  | Servitengasse               |
| 21 | 10 <sup>th</sup> District | Bloch-Bauer-Promenade       |
| 22 | 10 <sup>th</sup> District | Reumannplatz                |
| 23 | 12 <sup>th</sup> District | Meidlinger Hauptstraße      |
| 24 | 12 <sup>th</sup> District | Wolfganggasse               |
| 25 | 14 <sup>th</sup> District | Goldschlaggasse             |
| 26 | 15 <sup>th</sup> District | Friedrichsplatz             |
| 27 | 15 <sup>th</sup> District | Maria vom Siege             |
| 28 | 15 <sup>th</sup> District | Wasserwelt                  |
| 29 | 15 <sup>th</sup> District | Pelzgasse                   |
| 30 | 16 <sup>th</sup> District | Yppenplatz                  |
| 31 | 16 <sup>th</sup> District | Johann-Nepumuk-Berger-Platz |
| 32 | 18 <sup>th</sup> District | Johann-Nepumuk-Vogl-Platz   |
| 33 | 20 <sup>th</sup> District | Maria-Restituta-Platz       |
| 34 | 20 <sup>th</sup> District | Wallensteinplatz            |
| 35 | 21 <sup>st</sup> District | Franklinstraße              |
| 36 | 21 <sup>st</sup> District | Hoßplatz                    |
| 37 | 21 <sup>st</sup> District | Pius-Parsch-Platz           |
| 38 | 21 <sup>st</sup> District | Schlingerplatz              |
| 39 | 22 <sup>nd</sup> District | Edith-Piaf-Straße           |
| 40 | 22 <sup>nd</sup> District | Hannah-Arendt-Platz         |
| 41 | 22 <sup>nd</sup> District | Maria-Trapp-Platz           |
| 42 | 22 <sup>nd</sup> District | Mimi-Grossberg-Gasse        |
| 43 | 23 <sup>rd</sup> District | Liesinger Platz             |

 temporary  permanent climate-relevant measures
